# Supplementary material
Source: PubMed Central journal article supplement (PMC5192009)

**Figure S1**

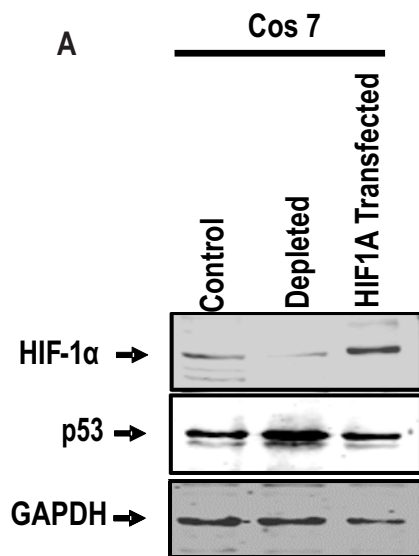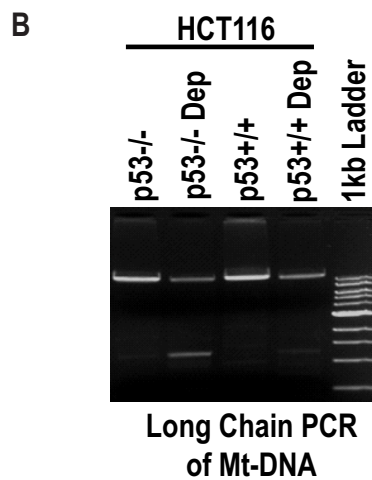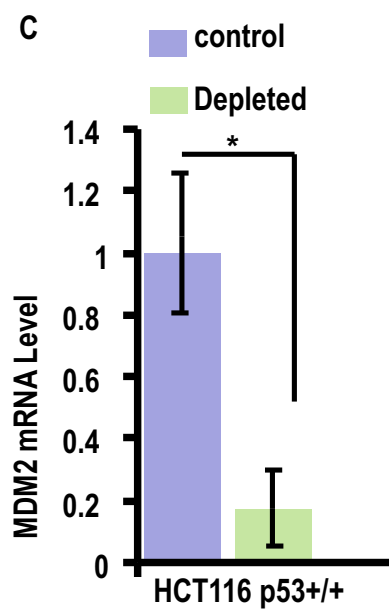

Supplement: NIHMS782265-supplement-2.pdf [file NIHMS782265-supplement-2.pdf]

Figure S2

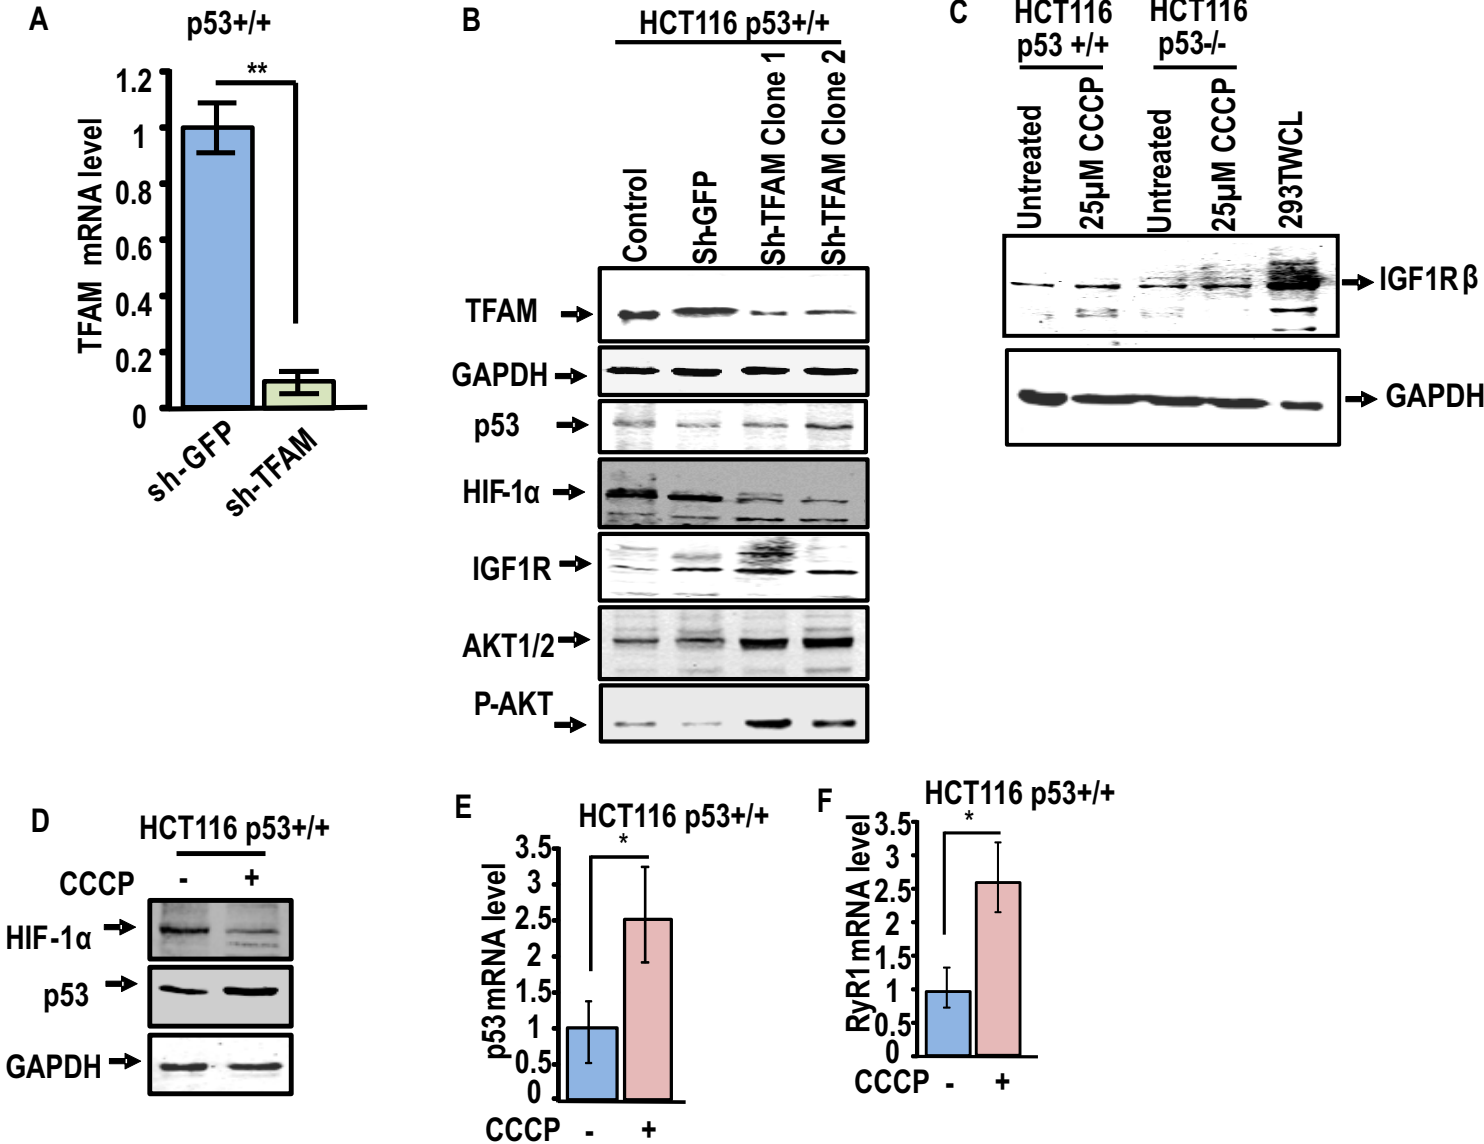

Supplement: NIHMS782265-supplement-3.pdf [file NIHMS782265-supplement-3.pdf]

Figure S3

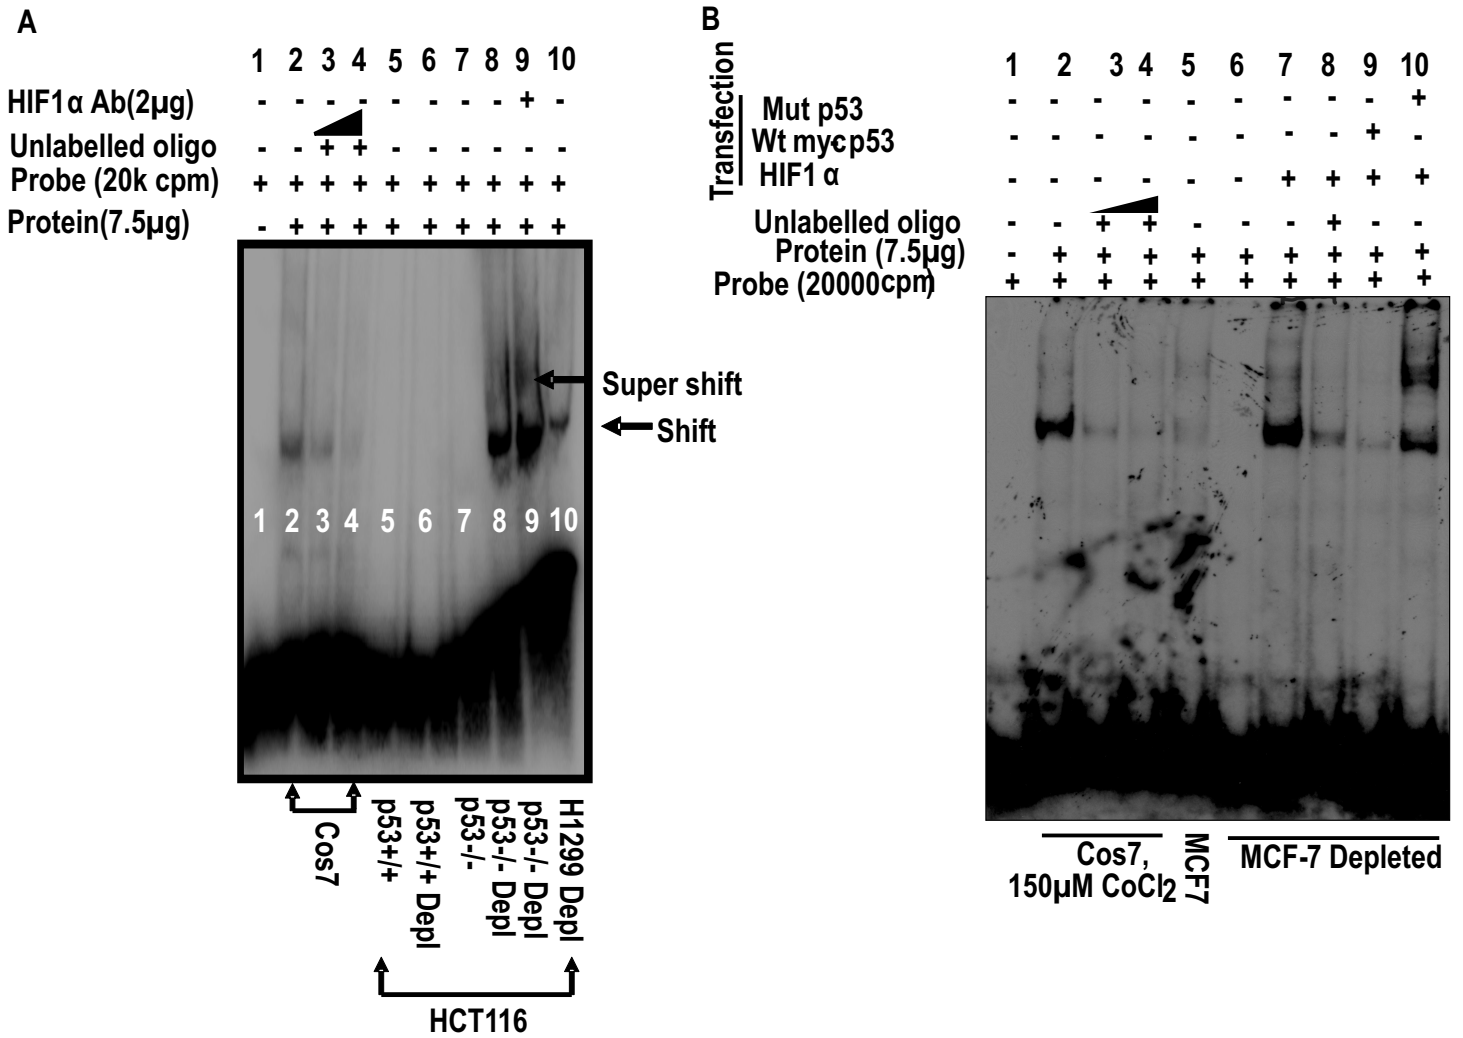

Supplement: NIHMS782265-supplement-4.pdf [file NIHMS782265-supplement-4.pdf]
